# Supplementary material for: Isotope dilution ICP-MS analysis of trace elements in a Syenite rock reference material
Source: Royal Society of Chemistry journal article supplement (doi:10.1039/b617981a), 2007-01-01
Supplement: sarm2.doc [file sarm2.doc]

This paper © The Royal Society of Chemistry 2007

Isotope dilution ICPMS analysis of trace elements in a Syenite rock reference material – Supplementary data

Angelique Botha,*a Alexander I Barzev,a and Johann L Fischerb

aCSIR National Metrology Laboratory, CSIR, Building 4E, Room 169, PO Box 395, Pretoria, 0001,South Africa; Fax: +27 12 841-2131; Tel: +27 12 841-3800; e-mail: [abotha@csir.co.za](mailto:abotha@csir.co.za)

bDepartment of Chemistry, University of Johannesburg, Aucklandpark Kingsway Campus, PO Box 524, Aucklandpark, 2006, South Africa; Fax +27 11 489-2819; Tel +27 11 489-2371; e-mail jlf@rau.ac.za

# ID-ICPMS analysis and isotope ratio measurements

The double isotope dilution analysis of a test sample requires the accurate measurement of the ratios between the spike and reference isotopes for any particular element in two blend solutions: the spiked sample and the spiked primary assay standard. The accurately known concentration of the primary assay standard is utilised to obtain an accurate estimate for the concentration of the spike isotope standard. The calculation of the mass fraction of the analyte in the test sample can therefore be obtained from the following **equation 1**:

(1)

## where,

## - index for the sample

- index for the spike

- index for the primary assay standard

- index for the blend of fractions of sample and spike

- index for the blend of fractions of the primary assay standard and spike

- Mass fraction of the analyte in the sample

- Mass fraction of the primary assay standard

- Mass of the sample in blend *b*

- Mass of the spike in sample blend *b*

- Mass of the primary assay standard in blend *b’*

- Mass of the spike in standard blend *b’*

- Dry mass correction factor

- Measured isotope amount ratio of blend *b*

- Measured isotope amount ratio in blend *b’*

- Measured isotope amount ratio in the sample

- Measured isotope amount ratio in the spike

- Measured isotope amount ratio in the primary assay standard

- Mass bias correction factor of Rb

- Mass bias correction factor of Rb’

- Mass bias correction factor of Rx

- Mass bias correction factor for Ry

- Mass bias correction factor of Rz

- Digestion correction factor

- Blank correction factor

- Sum of all isotope ratios of the analyte in the sample

- Sum of all isotope ratios of the analyte in the primary assay standard

# Measurement uncertainty

The combined standard uncertainty associated with the ID-ICPMS results of Ba, Sr, Cd, Pb, Mo, Zn, Cu and Ni for any independent determination were calculated in accordance with the ISO GUM1 and EURACHEM/CITAC guidelines2 for quantifying uncertainty of measurement. The following expression was used, which corresponds to the law of propagation of uncertainty, applied to the equation for the double isotope dilution determination:

(2)

where, (sensitivity coefficients) can be calculated from the partial derivatives of to each uncertainty component .

The combined standard uncertainty of the end result (the mean of the independent determinations) was calculated according to the following equation:

(3)

where,

Combined uncertainty of the mean result (of the independent determinations)

Combined standard uncertainty for determination 1

Combined standard uncertainty for determination

Experimental standard deviation of the mean result

= The total number of independent determinations

The expanded uncertainty, , was obtained by multiplying the combined standard uncertainty with a coverage factor of 2 to provide a 95.45% level of confidence for the ID-ICPMS result. An infinite number of degrees of freedom were calculated with the Welch-Satterthwaite1 equation.

The standard uncertainties associated with the individual uncertainty contributors to the ID-ICPMS method were calculated using the ISO GUM1 and EURACHEM/CITAC guidelines2, and included contributions from all input parameters in the measurement equation, as well as variation between the independent determinations.

*Standard uncertainty of the measured ratios, :*

Each solution is analysed in duplicate (aliquots ‘a’ and ‘b’). The standard uncertainty associated with a particular isotope ratio () for this solution, , is defined by the standard deviation, , for the duplicate measurements, and : , and is classified as a Type A uncertainty.

*Standard uncertainty of the mass bias correction factor, :*

A mass bias correction factor, for each of the eight elements, was calculated as the mean of the measured isotope ratios of the mass bias standard, compared to the ratio calculated from the IUPAC abundances for the isotopes. In the measurement sequence each sample was bracketed with a mass bias standard and the wash solution (see **Appendix A**). The standard uncertainty, , of the mean mass bias correction factor, , for each element is then defined as the experimental standard deviation of the mean mass bias correction factor : , and is classified as a Type A uncertainty.

*Standard uncertainty of the weighing process, :*

The standard uncertainty, associated with the weighing of materials in various mass ranges, is derived from experimental data taking into account the repeatability and absolute bias in the weight measurements, and is classified as a Type A uncertainty. The standard uncertainty for the weighing process was calculated with **equation 4**:

(4)

where,

= Combined standard uncertainty of the weighing process

= Repeatability (standard deviation of the experimental data)

= Bias (difference between mean and certified value of mass pieces used)

= Certified standard uncertainty of the mass pieces used

*Standard uncertainty of the dry mass correction factor, :*

The dry mass correction factors for the samples were calculated from the ratio of the weight of the dried sample versus the weight of the original test sample. The uncertainty of the dry mass correction factor takes into account the uncertainty contributions associated with the weighing of the original and dried samples:

(5)

where,

= Standard uncertainty of the dry mass correction factor

= Standard uncertainty associated with the weight of the dried sample

= Standard uncertainty associated with the weight of the original sample

*Combined standard uncertainty of the primary assay standard, :*

The combined standard uncertainty of the working standards for the primary assay standard was calculated by taking into account the uncertainty contributions associated with the source primary assay standard and the weighing process for the preparation of the intermediate standards. The standard uncertainty of the source primary assay standard is typically determined from the statement of uncertainty provided by the NIST (or generally from the producer of the certified standard) using the coverage factor or the level of confidence.

The combined standard uncertainty for the working standard of the primary assay standard used to prepare the spiked primary assay standard blends were calculated using equation 2.

*Standard uncertainty for the sum of ratios, and*

The uncertainty for the sum of ratios was calculated only in the determination of Pb. A separate analysis sequence for Pb consisting of the test sample and Pb primary assay standard as well as the mass bias isotope standard (NIST SRM 982) was run for the calculation of the corresponding sum of ratios for Pb. The uncertainties associated with the measurement of all possible Pb isotope ratios in the test sample and the standard, and , were calculated as described above, where and . The uncertainties associated with the mass bias correction factors for the corresponding isotope ratios in the test sample and the primary assay standard, and respectively, were calculated as described earlier and represent the experimental standard deviation of the mean of the measured ratios for each isotope ratio compared to the corresponding certified isotope ratios of the isotopic standard NIST SRM 982:

and

where

= the standard deviation of the mass bias correction factor for each of the Pb isotope ratios in the test sample.

= the standard deviation of the mass bias correction factor for each of the Pb isotope ratios in the primary assay standard.

= the number of mass bias standard measurements in the analysis sequence.

The combined uncertainty for the sum of Pb isotope ratios in the test sample and the primary assay standard were calculated using equation 2.

*Standard uncertainty of the blank correction factor, :*

All amounts of the reagents used in the preparation of the individual solutions were kept relatively constant. It was assumed therefore that the effect on the isotope ratios of the spiked samples and primary assay standards would be nearly identical and cancel out. However, since small differences in the amounts of the reagents added may exist, a blank correction factor equal to one and with assigned relative standard uncertainty of 0.2% was introduced and included in the measurement equation.

*Standard uncertainty associated with the digestion process, :*

A digestion correction factor of one, with an estimated relative standard uncertainty of 0.2%, was used to account for possible variations in the sample matrix, as well as discrimination effects that might occur in the equilibration process during digestion between the naturally occurring and spike isotopes. The relative uncertainty for the digestion process was estimated based on the fact that although the uncertainty is not a major contributor to the combined uncertainty of an ID-ICPMS measurement result in this laboratory, it is also not considered to be negligible.

A detailed evaluation of the uncertainty contributions towards the combined standard uncertainty in the determination of the analytes revealed that the major sources of uncertainty are associated with the measurement of the isotope ratios, the calculation of the mass bias correction factors and the assigned uncertainty of the primary assay standards. Some of these major contributors confirm the findings of a previous study3. All these uncertainty contributions, with the exception of the amount content of the primary assay standard, are type A uncertainties based on experimental data.

**Method validation**

### The developed methodology for ID-ICPMS analysis of rock samples and the applied experimental designs were also applied in analysis of the rock type CRM SY-4 (Diorite Gneiss). The elements of interest were independently determined from three digestions (Cu, Ni, Pb, Zn, Cd and Mo) or four digestions (Sr and Ba). The measured concentrations and associated uncertainties from the ID-ICPMS analyses are presented in Table 1 together with the certification values. Any possible biases between the measured and certified values for the elements of interest were evaluated by calculation of the recoveries as well as the -values4.

(4)

The -values compares the differences between the measured and the certified values for the elements with the uncertainties and -values better than one is an indication that the measured and certified value is comparable.

For all the elements where the recoveries could be calculated for SY-4, the results were within the level of confidence of 95%, except for Ni where the recoveries were lower. All the -values, except for Zn and Ni, were better than 1 indicating good comparability between the measured and certified values within the calculated uncertainties.

**Table 1**: Comparison of certified and measured values for SY-4

| **Element** | **Certified** | | **Measured** | | **Recovery %** | **-values** |
| --- | --- | --- | --- | --- | --- | --- |
|  | **Value** | **Uncertaintya (k=2)** | **Value** | **Uncertainty (k=2)** |  |  |
|  | **μg.g-1** | **μg.g-1** | **μg.g-1** | **μg.g-1** |  |  |
| Ba | 340 | 5 | 338.2 | 5.8 | 99.5 | 0.24 |
| Cd | 0.1-2b |  | 0.18 | 0.06 |  |  |
| Cu | 7 | 1 | 6.9 | 1.4 | 98.6 | 0.06 |
| Mo | 0.2-3b |  | 0.28 | 0.03 |  |  |
| Ni | 9 | 1 | 6.7 | 0.3 | 74.4 | 2.2 |
| Pb | 10 | 1 | 9.6 | 0.1 | 96.0 | 0.40 |
| Sr | 1191 | 12 | 1185 | 26 | 99.5 | 0.21 |
| Zn | 93 | 2 | 97.5 | 1.3 | 104.8 | -1.9 |

# a Calculated from the experimental standard deviation of the mean with a coverage factor k=2.

# b Range of expected values

##### References

1. ISO GUM, Guide to the expression of uncertainty in measurement, International Organisation for Standardisation, Geneva, Switzerland, 1993, 101pp.
2. EURACHEM/CITAC Guide, Quantifying uncertainty in Analytical Measurement, Second edition, 2000. 120pp.
3. C. S. J. Wolffe Briche, C. Harrington, T. Catterick, B. Fairman, *Anal. Chim. Acta*, 2001, **437**, 1-10.
4. ISO Guide 43-1 Proficiency testing by interlaboratory comparisons – Part 1: Development and operation of proficiency testing schemes. International Organisation for Standardisation, Geneva, Switzerland, 1997, 16pp.

# APPENDIX A

# SEQUENCE OF HR-ICPMS SAMPLE ANALYSIS

## Wash-1

### Standard-1

#### Wash-2

Reagent-blank-1

Reagent-blank-2

#### Wash-3

### Standard-2

#### Wash-4

Primary standard-1

Primary standard-2

#### Wash-5

### Standard-3

#### Wash-6

Sample-1

Sample-2

#### Wash-7

### Standard-4

#### Wash-8

Reagent-blank + spike-1

Reagent-blank + spike-2

#### Wash-9

### Standard-5

#### Wash-10

Primary standard + spike-1

Primary standard + + spike-2

#### Wash-11

### Standard-6

#### Wash-12

##### Sample + spike-1

Sample + spike-2

#### Wash-13

### Standard-7

#### Wash-14
